# Supplementary material
Source: PubMed Central journal article supplement (PMC8323984)

A

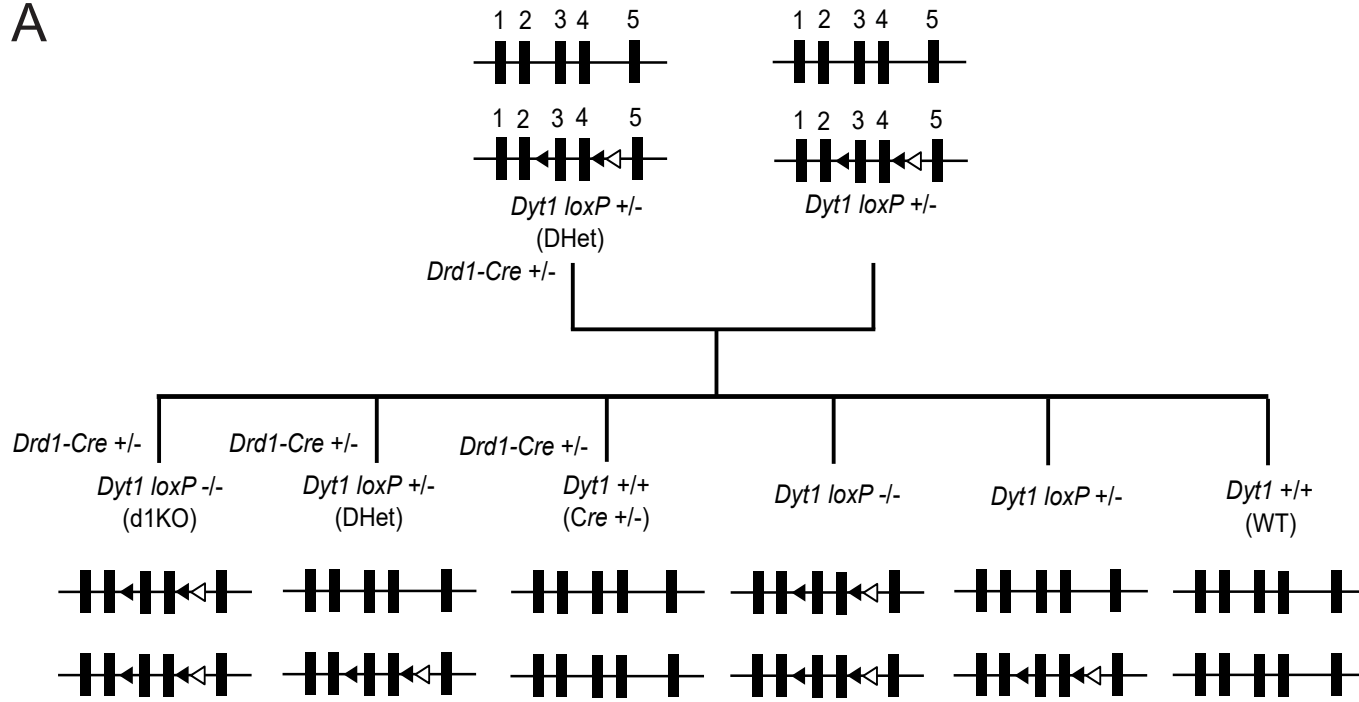

B

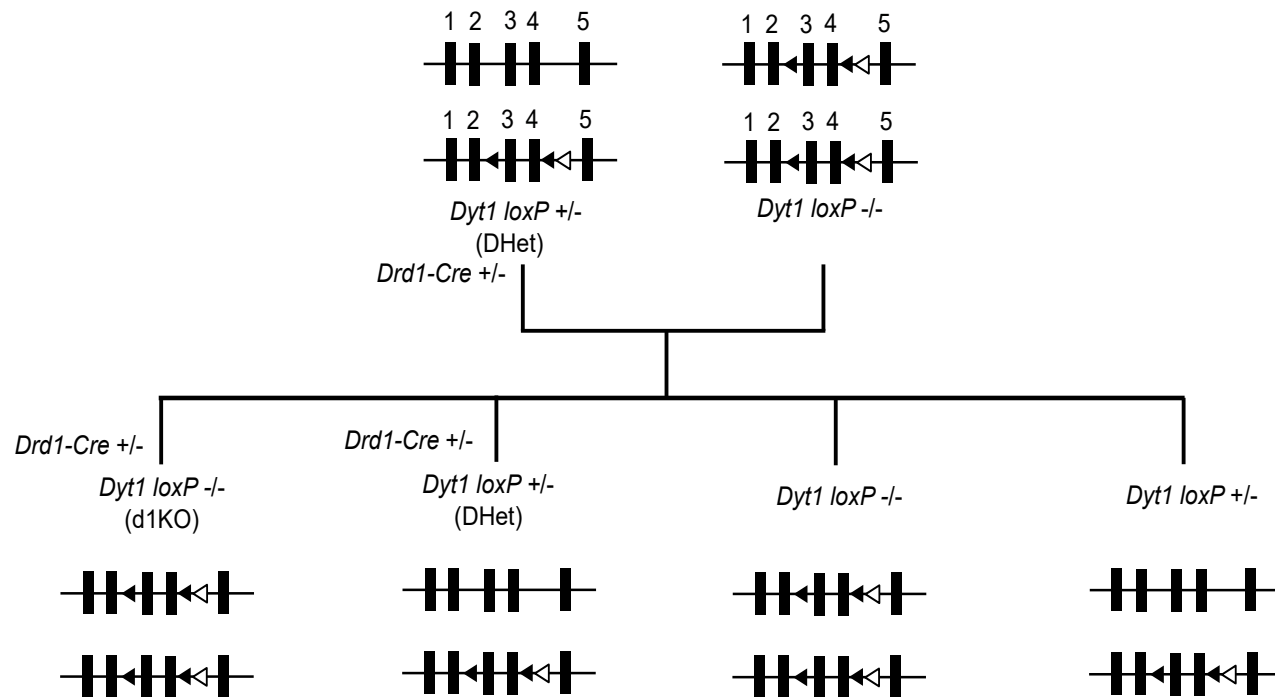

Supplement: NIHMS1724997-supplement-supplementary_figure_1.pdf [file NIHMS1724997-supplement-supplementary_figure_1.pdf]

A

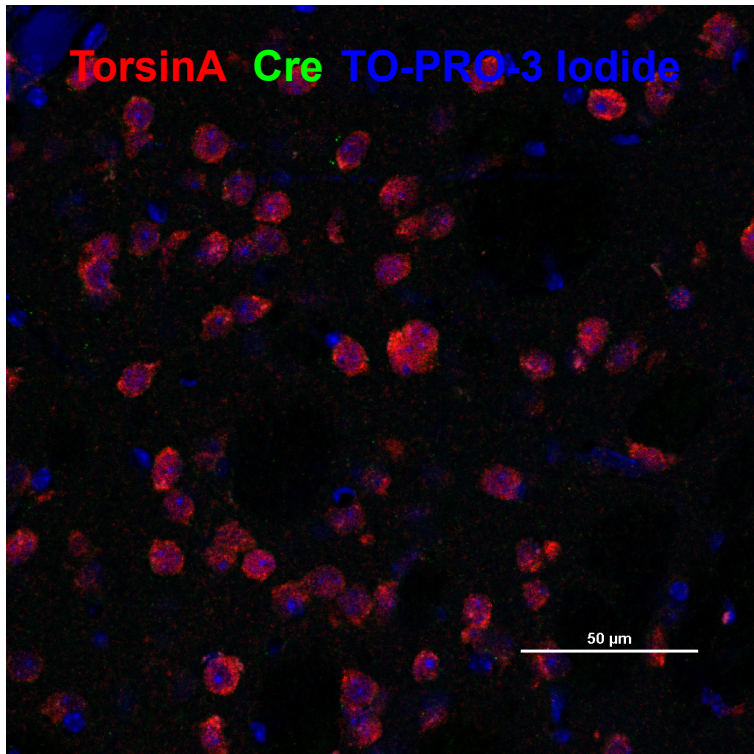

B

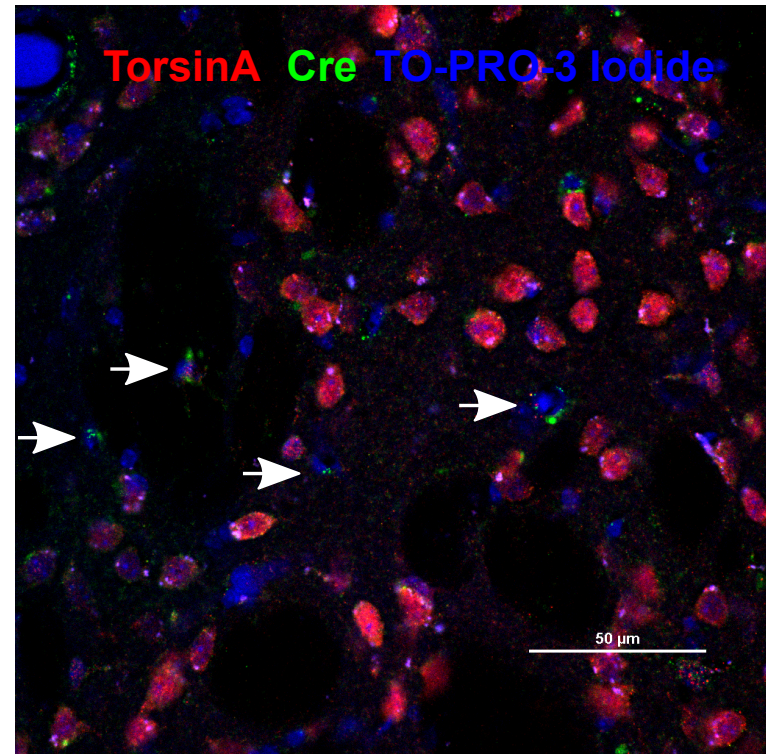

Supplement: NIHMS1724997-supplement-supplementary_figure_2.pdf [file NIHMS1724997-supplement-supplementary_figure_2.pdf]
